# Supplementary material for: Molecular Targeting of VEGF with a Suramin Fragment–DOCA Conjugate by Mimicking the Action of Low Molecular Weight Heparins
Source: PubMed Central journal article supplement (PMC7823656; doi:10.3390/biom11010046), 2020-12-31
Supplement: biomolecules-11-00046-s001.pdf [file biomolecules-11-00046-s001.pdf]

## Supplementary Information

# Molecular Targeting of VEGF with a Suramin Fragment–DOCA Conjugate by Mimicking the Action of Low Molecular Weight Heparins

Jooho Park<sup>1\*</sup>, Tae-Bong Kang<sup>2</sup>, Ji-Hong Lim<sup>1</sup> and Hyung-Sik Won<sup>2</sup>

<sup>1</sup>Department of Biomedical Chemistry, College of Biomedical & Health Science, Konkuk University, Chungju 27478, Chungbuk, Republic of Korea; pkjhdn@kku.ac.kr (J. P)

<sup>2</sup>Department of Biotechnology, College of Biomedical & Health Science, Konkuk University, Chungju 27478, Chungbuk, Republic of Korea; kangtbko@kku.ac.kr (T.B.K.)

\*Correspondence: pkjhdn@kku.ac.kr; Tel.: +82-43-840-3574 (J.P.)

### S1. Results and Discussion

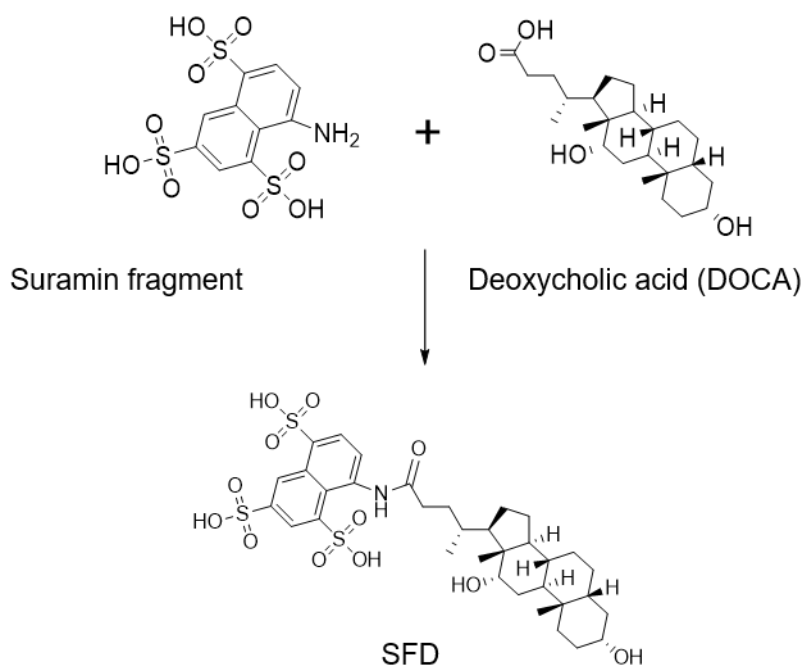

**Figure S1.** Synthetic scheme of suramin fragment and deoxycholic acid conjugate (SFD). Suramin fragment was conjugated to deoxycholic acid (DOCA) in one step.

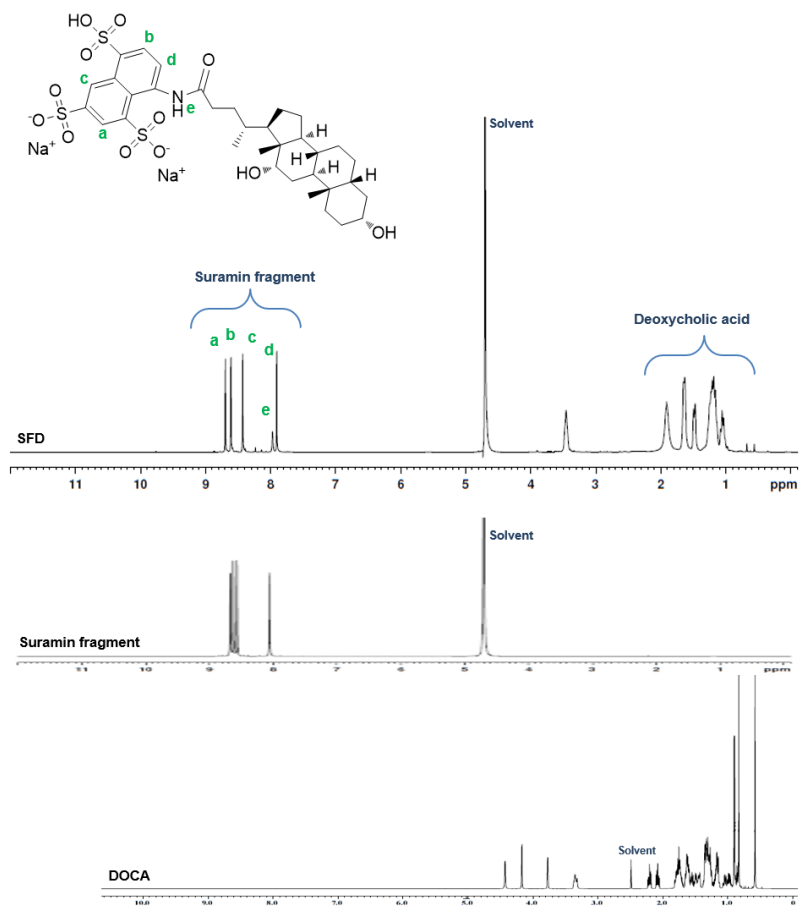

**Figure S2.** <sup>1</sup>H-NMR spectra of SFD (deuterium oxide as solvent), suramin fragment (deuterium oxide as solvent) and DOCA (dimethyl sulfoxide-d<sub>6</sub> as solvent) (500 MHz).
